# Supplementary material
Source: HighWire-hosted journal article supplement (https://www.cmaj.ca/highwire/filestream/59494/field_highwire_adjunct_files/3/150632-res-4-at.pdf)
Supplement: 150632-res-4-at.pdf [file 150632-res-4-at.pdf]

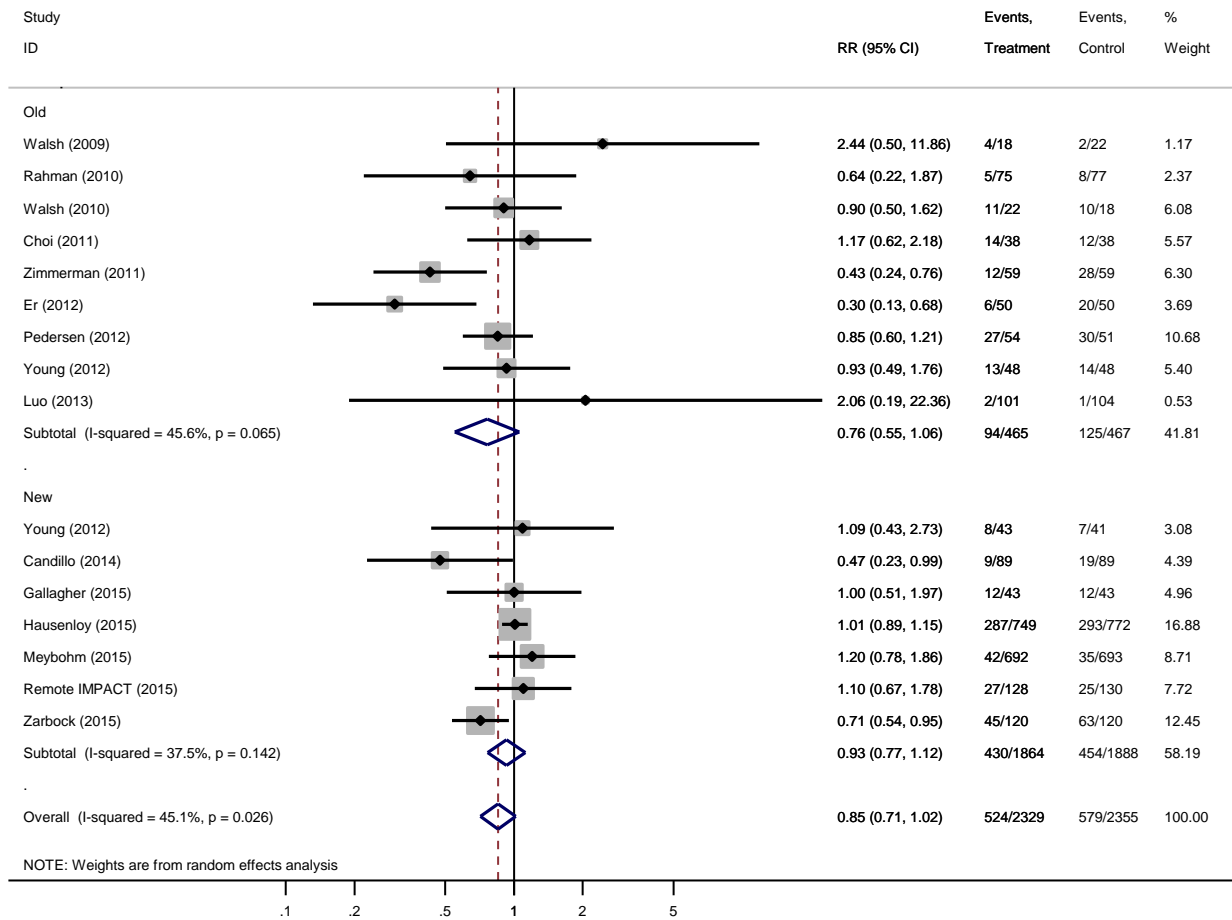

Appendix 4 (as supplied by the authors). Updated results of Yang et al<sup>1</sup> meta-analysis of acute kidney injury in cardiac surgery patients that undergo remote ischemic preconditioning compared to controls.

## Reference

1. Yang Y, Lang XB, Zhang P, et al. Remote ischemic preconditioning for prevention of acute kidney injury: a metaanalysis of randomized controlled trials. *Am J Kidney Dis* 2014;64:574-83.
